# Glycosylation-on-a-chip: a flow-based microfluidic system for cell-free glycoprotein biosynthesis

1 Alicia K. Aquino<sup>1</sup>†, Zachary A. Manzer<sup>1</sup>†, Susan Daniel<sup>1</sup>\*, and Matthew P. DeLisa<sup>1,2</sup>\*

2 <sup>1</sup>Robert Frederick Smith School of Chemical and Biomolecular Engineering, Cornell University,  
3 Ithaca, NY, United States

4 <sup>2</sup>Cornell Institute of Biotechnology, Cornell University, 130 Biotechnology Building, Ithaca, NY  
5 14853 USA

6 †These authors have contributed equally to this work

7

8 \*Address correspondence to:

9 Matthew P. DeLisa, Robert Frederick Smith School of Chemical and Biomolecular Engineering,  
10 Cornell University, Ithaca, NY 14853. Tel: 607-254-8560; Email: [md255@cornell.edu](mailto:md255@cornell.edu)

11 Susan Daniel, Robert Frederick Smith School of Chemical and Biomolecular Engineering, Cornell  
12 University, Ithaca, NY 14853. Tel: 607-255-4675; Email: [sd386@cornell.edu](mailto:sd386@cornell.edu)

13 **Keywords:** cell-free systems, biomanufacturing, microfluidics, cell-free protein synthesis, *N*-  
14 glycans, glycosylation, enzyme immobilization, chemoenzymatic synthesis

## 15 Abstract

16 In recent years, cell-free synthetic glycobiology technologies have emerged that enable production and  
17 remodeling of glycoproteins outside the confines of the cell. However, many of these systems combine  
18 multiple synthesis steps into one pot where there can be competing reactions and side products that  
19 ultimately lead to low yield of the desired product. In this work, we describe a microfluidic platform  
20 that integrates cell-free protein synthesis, glycosylation, and purification of a model glycoprotein in  
21 separate compartments where each step can be individually optimized. Microfluidics offer advantages  
22 such as reaction compartmentalization, tunable residence time, the ability to tether enzymes for reuse,  
23 and the potential for continuous manufacturing. Moreover, it affords an opportunity for spatiotemporal  
24 control of glycosylation reactions that is difficult to achieve with existing cell-based and cell-free  
25 glycosylation systems. In this work, we demonstrate a flow-based glycoprotein synthesis system that  
26 promotes enhanced cell-free protein synthesis, efficient protein glycosylation with an immobilized  
27 oligosaccharyltransferase, and enrichment of the protein product from cell-free lysate. Overall, this  
28 work represents a first-in-kind glycosylation-on-a-chip prototype that could find use as a laboratory  
29 tool for mechanistic dissection of the protein glycosylation process as well as a biomanufacturing  
30 platform for small batch, decentralized glycoprotein production.

## 31 1 Introduction

32 Protein glycosylation is a major posttranslational modification where complex carbohydrates  
33 known as glycans are enzymatically added to amino acid sidechains of a protein at specific,  
34 regioselective positions. The potential information content encoded in these glycans greatly exceeds  
35 that of other biomacromolecules, with distinct glycan structures often playing critical roles in health  
36 and disease<sup>1,2</sup>. The attachment of glycans to asparagine residues, known as *N*-linked glycosylation, is  
37 the most abundant type of glycosylation and occurs in all domains of life<sup>3</sup>. This mode of glycosylation  
38 gives rise to diverse chemical structures that are well known to affect the biological and biophysical  
39 properties of a protein<sup>4-7</sup>. Because of these pronounced effects, there is a strong incentive to study  
40 glycosylation and leverage the resulting knowledge for the development of glycoengineered proteins  
41 with advantageous properties<sup>8-11</sup>.

42 In eukaryotic *N*-glycosylation, glycans are first assembled by glycosyltransferases (GTs) in the  
43 cytosol and endoplasmic reticulum (ER), then transferred *en bloc* to the acceptor protein by an  
44 oligosaccharyltransferase (OST) in the endoplasmic reticulum, and finally elaborated to final structures  
45 as the protein is trafficked through the secretory pathway<sup>12,13</sup>. Thus, unlike the template-driven  
46 biosynthesis of DNA, RNA and proteins, glycan biosynthesis is controlled by the availability,  
47 abundance, and specificities of GTs and other enzymes involved in glycan synthesis and catabolism<sup>14</sup>.  
48 Because of the complexity of this multi-compartment, enzymatic process, products of natural protein  
49 glycosylation pathways are typically heterogeneous mixtures of glycoforms that can be difficult to  
50 isolate from the array of intermediate glycoforms and side products. As a step towards producing more  
51 homogeneous glycoprotein products, efforts have been made to better understand, control, and expand  
52 glycan synthesis in eukaryotic cell-based systems<sup>15-18</sup>. However, an inherent challenge of engineering  
53 existing glycosylation networks in eukaryotic cells is that *N*-linked glycosylation is an essential  
54 function, so modifications to these networks for the purpose of altering the target glycoprotein product  
55 can have adverse effects on the cell. Thus, even with the availability of powerful genome editing tools  
56 such as CRISPR-Cas for glycosylation engineering<sup>19</sup> there are strict limits on the extent of top-down  
57 engineering that one can achieve in eukaryotic host cells. As such, there remains a need for alternative  
58 methods to produce structurally uniform glycans in sufficient quantities for mechanistic studies and  
59 other downstream applications.

60 To this end, the emerging field of cell-free synthetic glycobiology has helped to expand the  
61 glycoengineering toolbox with new methods for synthesizing glycomolecules outside the confines of  
62 living cells<sup>20,21</sup>. In these approaches, glycosylation enzymes and substrates are synthesized and  
63 assembled *in vitro* to form multistep glycosylation pathways, with the simplest forms involving  
64 purified components such that the reaction composition is well-controlled<sup>22</sup>. Alternatively,  
65 glycosylation enzymes and substrates can be prepared by cell-free protein synthesis (CFPS)  
66 individually<sup>23</sup> or in a single-pot reaction<sup>24</sup> to circumvent labor- and time- intensive protein purification  
67 steps. The advantages of these and other “open” formats for synthesis of glycans and glycoconjugates  
68 include enhanced control over reaction conditions, decoupling of glycosylation and protein synthesis  
69 from cell viability, and the ability to use enzymes from any and/or multiple host cells in the same system.  
70 Moreover, cell-free biomanufacturing is amenable to real time monitoring, automation, and continuous  
71 manufacturing systems.

72 In the context of CFPS, microfluidics offers a unique opportunity to build scaled-down models  
73 of integrated protein production systems in a format that enables precise and tunable spatiotemporal  
74 control, usage of small volumes that minimize waste, experimentation on length and time scales similar  
75 to those in cells, and in-line process monitoring through real-time, high resolution imaging<sup>25,26</sup>. Indeed,  
76 microfluidic systems have been shown to improve CFPS in many ways<sup>27</sup>. In particular, protein yields  
77 from microfluidic CFPS systems were measurably increased compared to those of traditional one-pot  
78 CFPS reactions as a result of greater heat and mass transfer<sup>28</sup> and the exchange of reactants and waste  
79 products through dialysis membranes<sup>29</sup> or engineered nanopores<sup>30</sup>. Furthermore, CFPS has been

80 combined with affinity purification in integrated microfluidic systems, enabling efficient protein  
81 synthesis and capture<sup>31,32</sup>. With respect to cell-free synthetic glycobiology, there has only been one  
82 report describing the use of a microfluidic system in combination with a glycoenzyme<sup>33</sup>. In this seminal  
83 work, a digital microfluidics chip was used to merge a droplet containing the soluble GT enzyme D-  
84 glucosaminyl 3-*O*-sulfotransferase isoform-1 (3-OST-1) and its adenosine 3'-phosphate 5'-  
85 phosphosulfate (PAPS) cofactor with a second droplet containing heparin sulfate (HS) glycans  
86 immobilized on magnetic nanoparticles. Following merging of the droplets on-chip, the HS-  
87 nanoparticles became enzymatically sulfated as determined by off-chip analysis of the immobilized  
88 HS glycans. To our knowledge, however, there have been no reports of microfluidics-based cell-free  
89 protein glycosylation.

90 Here, we developed a first-in-kind microfluidic device for achieving controllable biosynthesis  
91 of glycoproteins, which involved reconfiguring a one-pot method for cell-free glycoprotein synthesis  
92 (CFGpS)<sup>24</sup> into a microfluidic architecture. Our prototype involved spatiotemporally separating protein  
93 synthesis and protein glycosylation, akin to the subcellular compartmentalization that underlies the  
94 biosynthesis of glycoproteins in eukaryotic cells. Specifically, we modeled the cytosol and ER with a  
95 modular device that is capable of continuously synthesizing (module 1) and glycosylating (module 2)  
96 proteins, after which the post-translationally modified protein products were enriched from the reaction  
97 mixture by affinity capture (module 3) (**Fig. 1**). Our results demonstrate that the resulting device was  
98 capable of site-specific glycosylation of a model protein, namely superfolder green fluorescent protein  
99 (sfGFP), with a bacterial heptasaccharide glycan at a defined C-terminal acceptor site. Importantly,  
100 this work represents the first enzymatic glycosylation of a protein substrate in a microfluidic device  
101 and a critical first step on the path to building more complex reaction networks for *N*-linked protein  
102 glycosylation that more closely mimic the highly coordinated and compartmentalized process in  
103 eukaryotic cells.

## 104 **2 Materials and Methods**

### 105 **2.1 Bacterial strains and plasmids**

106 *E. coli* strain DH5 $\alpha$  (lab stock) was used for all molecular biology. *E. coli* strain BL21 Star<sup>TM</sup>  
107 (DE3) (Novagen) was used for expression and purification of sfGFP containing a C-terminal  
108 glycosylation tag<sup>34</sup> and polyhistidine tag (sfGFP<sup>DQNAT-6xHis</sup>), which was used for *in vitro* glycosylation  
109 reactions. *E. coli* strain BL21 Star<sup>TM</sup> (DE3) was also used for expression of the enzyme BirA, which  
110 was used for biotinylation of the *Campylobacter jejuni* OST enzyme PglB (*CjPglB*), and for preparing  
111 crude S30 extract. *E. coli* strain CLM24<sup>35</sup> was used for expression and purification of *CjPglB* while  
112 *E. coli* strain SCM6<sup>36</sup> was used for preparation of lipid-linked oligosaccharides bearing *C. jejuni*  
113 heptasaccharide glycans (*CjLLOs*).

114 For cell-free expression of sfGFP<sup>DQNAT-6xHis</sup>, the pJL1-sfGFP<sup>DQNAT-6xHis</sup> plasmid<sup>24</sup> was used.  
115 Plasmid pTrc99a-BirA (lab stock) was used for expression of the BirA enzyme. Plasmid pSPI01A-  
116 *CjPglB* encoding *CjPglB* with a C-terminal AviTag was constructed as follows. First, the *CjPglB*<sup>10xHis</sup>  
117 gene was PCR amplified from plasmid pSN18<sup>37</sup> and the resulting PCR product was then ligated  
118 between the NdeI and EcoRI restriction sites in plasmid pSPI01A<sup>38</sup>, a vector containing the AviTag  
119 after the EcoRI cut site. All plasmids were confirmed by DNA sequencing at the Biotechnology  
120 Resource Center of the Cornell Institute of Biotechnology.

### 121 **2.2 Protein expression, biotinylation, and purification**

122 Preparation of lysates containing *CjPglB* with a C-terminal AviTag was performed according to  
123 previously published methods<sup>18,24</sup>. Briefly, a colony of *E. coli* CLM24 carrying plasmid pSPI01A-  
124 *CjPglB* was grown overnight in 5 mL of Luria-Bertani (LB) media supplemented with

125 chloramphenicol. Overnight cultures were then subcultured into 1 L of terrific broth (TB; 24 g/L yeast  
126 extract, 12 g/L tryptone, 8 mL glycerol, 10% (v/v) 0.72 M K<sub>2</sub>HPO<sub>4</sub>/0.17 M KH<sub>2</sub>PO<sub>4</sub> buffer)  
127 supplemented with chloramphenicol. Cells were grown at 37°C until an optical density at 600 nm  
128 (OD<sub>600</sub>) of ~0.6 and then induced with 100 μM isopropyl β-D-1-thiogalactopyranoside (IPTG) for 18  
129 h at 16°C. Cells were harvested by centrifugation, after which the pellet was resuspended in Buffer 1  
130 (25 mM TrisHCl, 250mM NaCl, pH 8.5) and lysed using a C5 Emulsiflex homogenizer (Avestin). The  
131 lysate was centrifuged to remove cellular debris and the supernatant was ultracentrifuged at 120,000 ×  
132 g for 1 h at 4°C. The resulting pellet was manually resuspended using a Potter-Elvehjem tissue  
133 homogenizer into buffer 2 (25 mM TrisHCl, pH 8.5, 250 mM NaCl, 1% (w/v) n-dodecyl-β-D-maltoside  
134 (DDM), and 10% (v/v) glycerol). Once fully resuspended, the solution was rotated at room temperature  
135 to facilitate solubilization of the protein and then ultracentrifuged again at 120,000 × g for 1 h at 4°C.

136 To prepare BirA-containing lysate, BL21(DE3) cells carrying pTrc99a-BirA were grown  
137 overnight and then subcultured into 250 mL of LB media supplemented with kanamycin. Upon  
138 reaching an OD<sub>600</sub> of ~0.6, cells were induced with 100 μM IPTG for 18 h at 30°C. Cells were  
139 harvested, resuspended in Buffer 1, lysed by homogenization, and centrifuged to remove cellular  
140 debris. To prepare biotinylated *CjPglB* (*CjPglB*-biotin), *CjPglB*-containing lysate was mixed with  
141 BirA-containing lysate and 5 mM biotin, 10 mM MgCl<sub>2</sub>, 10 mM ATP, and 1 EDTA-free protease  
142 inhibitor cocktail tablet (Thermo Scientific). The mixture was rotated overnight at 4°C to allow time  
143 for biotinylation. *CjPglB*-biotin was then enriched using HisPur Ni-NTA resin (Thermo Scientific)  
144 according to manufacturer's recommendations and the elution fraction was desalted with buffer  
145 containing 50 mM HEPES, pH 7.5, 100 mM NaCl, 5% glycerol (v/v), and 0.05% DDM.

146 To prepare sfGFP<sup>DQNAT-6xHis</sup>, BL21(DE3) cells carrying plasmid pJL1-sfGFP<sup>DQNAT-6xHis</sup> were  
147 grown overnight and subcultured in LB media supplemented with kanamycin. Upon reaching an OD<sub>600</sub>  
148 of ~0.6, cells were induced with 100 μM IPTG for 18 h at 30°C. Cells were collected, resuspended in  
149 buffer containing 50 mM NaH<sub>2</sub>PO<sub>4</sub>, pH 8, 300 mM NaCl and lysed as above. The sfGFP<sup>DQNAT-6xHis</sup>  
150 was purified using HisPur Ni-NTA resin as above. The final protein was desalted using buffer  
151 containing 20 mM HEPES, pH 7.5, 500 mM NaCl, 1 mM EDTA.

### 152 2.3 Solvent extraction of *Cj*LLOs

153 *Cj*LLOs were prepared by organic solvent-based extraction according to a protocol that was  
154 adapted from previous methods<sup>24,39</sup>. Briefly, SCM6 cells carrying plasmid pMW07-pglΔB<sup>40</sup> were  
155 grown overnight in LB media supplemented with chloramphenicol. Cells were then subcultured into 1  
156 L of TB media, grown at 37°C until reaching an OD<sub>600</sub> of ~0.7, then induced with a final concentration  
157 of 0.2% (w/v) *L*-arabinose for 16 h at 30°C. After induction, cells were harvested by centrifugation,  
158 the pellet re-suspended in methanol, and the cells dried for two days at room temperature. After drying,  
159 the cells were collected and subsequently suspended in 12 mL 3:2 (v/v) chloroform:methanol, 20 mL  
160 water, and 18 mL 10:10:3 (v/v/v) chloroform:methanol:water. After each step, sonication was used to  
161 facilitate extraction of LLOs. After the first two sonication steps, centrifugation was used to separate  
162 shorter sugars and water-soluble compounds in the supernatant from the pellet. After the final step,  
163 centrifugation was used to pellet the cellular debris and the supernatant was collected and dried at room  
164 temperature. After drying, the LLOs were resuspended in buffer containing 10 mM HEPES, pH 7.5,  
165 and 0.01% DDM and stored at -20°C.

### 167 2.4 Fabrication of microfluidic devices

168 Microfluidic masters were made on silicon wafers according to standard photolithography  
169 protocols at the Cornell NanoScale Science and Technology Facility. Briefly, SPR220-7.0 photoresist  
170 was spun onto silicon wafers and exposed using an ABM Contact Aligner. Wafers were developed



171 using a Microposit MIF 300. Coated wafers were etched to the desired depth using a Unaxis 770 Deep  
172 Silicon Etcher, which was confirmed by using a Tencor P10 profilometer. Remaining photoresist was  
173 removed via plasma cleaning, and a coating of (1H,1H,2H,2H-perfluorooctyl) trichlorosilane (FOTS)  
174 was applied using a MVD-100 to allow for easy removal of polydimethylsiloxane (PDMS).  
175 Microfluidic devices were made by pouring degassed PDMS (mixed 1:10 with crosslinker) and curing  
176 for 5 h at 60°C. PDMS molds were cleaned with ethanol and MilliQ water, before being dried with  
177 nitrogen gas. Final devices were assembled after oxygen plasma cleaning at 700  $\mu\text{m}$  for 25 sec and  
178 sealed with a Piranha washed (70/30 (v/v)  $\text{H}_2\text{SO}_4/\text{H}_2\text{O}_2$  for 10 min) glass coverslip. Devices were  
179 placed in a 70°C oven for 10 min to promote bonding of the PDMS to the glass.

## 180 2.5 Cell-free protein synthesis

181 S30 crude extracts for CFPS reactions were prepared using a simple sonication-based method<sup>41</sup>.  
182 Briefly, BL21(DE3) cells were grown in 1 L of 2xYTPG media (16 g/L tryptone, 10 g/L yeast extract,  
183 5 g/L NaCl, 7 g/L  $\text{K}_2\text{HPO}_4$ , 3 g/L  $\text{KH}_2\text{PO}_4$ , 20 g/L glucose) and harvested upon reaching an  $\text{OD}_{600}$  of  
184  $\sim 3.0$ . Cell mass was washed three times in Buffer A (10 mM Tris-acetate, pH 8.2, 14 mM magnesium  
185 acetate, 60 mM potassium glutamate and 2 mM dithiothreitol) then resuspended in a ratio of 1 mL of  
186 Buffer A to 1 g wet cell mass. The resuspended cells were sonicated with an optimal energy input  
187 (reported based on the volume obtained after resuspending cells) and centrifuged at  $30,000 \times g$  to obtain  
188 S30 extract, and the supernatant stored at -80°C. No run-off reaction was needed for the BL21(DE3)  
189 extract.

190 CFPS reactions consisted of a mixture of components at a final concentration of 13 ng/ $\mu\text{L}$   
191 plasmid DNA, 40% (v/v) S30 crude extract, 1.2 mM adenosine triphosphate (ATP), 0.85 mM  
192 guanosine triphosphate (GTP), 0.85 mM uridine triphosphate (UTP), 0.85 mM cytidine triphosphate  
193 (CTP), 34  $\mu\text{g}/\text{mL}$  L-5-formyl-5, 6, 7, 8-tetrahydrofolic acid (folinic acid); 170  $\mu\text{g}/\text{mL}$  of *E. coli* tRNA  
194 mixture, 130 mM potassium glutamate, 10 mM ammonium glutamate, 12 mM magnesium glutamate,  
195 2 mM each of 20 amino acids, 0.33 mM nicotinamide adenine dinucleotide (NAD), 0.27 mM  
196 coenzyme-A (CoA), 1.5 mM spermidine, 1 mM putrescine, 4 mM sodium oxalate, 33 mM  
197 phosphoenolpyruvate (PEP), 100  $\mu\text{g}/\text{mL}$  T7 RNA polymerase.

198 For CFPS in a microcentrifuge tube, 15- $\mu\text{L}$  reactions were conducted in 1.5-mL microtubes in a  
199 30°C incubator. For CFPS on-chip batch reactions, CFPS reaction mixtures were manually inserted  
200 into the microfluidic device using a syringe and incubated at 30°C in a moist environment to prevent  
201 evaporation. For CFPS on-chip reactions with continuous flow, two mixtures were prepared— one  
202 containing S30 crude extract and T7 RNA polymerase and the other containing the rest of the CFPS  
203 components— that when combined contained all components diluted to the final concentrations of a  
204 standard CFPS reaction. These mixtures were flown into the microfluidic device using a syringe pump  
205 where the reactants had a total residence time in each chip of 30 min.

## 206 2.6 Preparation of functionalized surfaces

207 Silane-PEG5000-biotin (Nanocs, Inc.) was dissolved in 95% (w/w) ethanol in water according  
208 to the manufacturer's recommendations. The solution was manually pushed into the microfluidic  
209 devices and left to react for 2 h at room temperature. Devices were flushed with 100  $\mu\text{L}$  of MilliQ water  
210 and then PBS at a flowrate of 10  $\mu\text{L}/\text{min}$ . A solution of 100  $\mu\text{g}/\text{mL}$  NeutrAvidin (Thermo Scientific)  
211 was then introduced and left to bind to the surface for 1 h. For loading of purified *CjPglB*-biotin, the  
212 devices were rinsed with PBS and then buffer containing 50 mM HEPES, 100 mM NaCl, 5% (v/v)  
213 glycerol, and 0.01% (w/v) DDM at pH 7.5. The purified *CjPglB*-biotin was then introduced into the  
214 device and allowed to bind overnight at 4°C; unbound enzyme was rinsed away before use.

## 215 2.7 On- and off-chip glycosylation

216 For off-chip *in vitro* glycosylation (IVG) reactions, mixtures consisted of components at a final  
217 concentration of 17  $\mu\text{g}/\text{mL}$  of purified sfGFP<sup>DQ<sub>N</sub>A<sub>T</sub>-6xHis</sup>, 170  $\mu\text{g}/\text{mL}$  solvent-extracted CjLLOs, 10 mM  
218 MnCl<sub>2</sub>, and 0.1% (w/v%) DDM. For microcentrifuge tube reactions, IVG reaction mixtures were  
219 supplemented with 170  $\mu\text{g}/\text{mL}$  purified CjPglB-biotin to a final volume of 30  $\mu\text{L}$  and reactions were  
220 conducted in 1.5 mL microtubes in a 30°C incubator.

221 For on-chip glycosylation experiments, purified CjPglB-biotin was immobilized on the  
222 functionalized surface of the device and the IVG reaction mixture was continuously pushed through  
223 the channels using a syringe pump with a total residence time of 30 min per chip. The reaction was  
224 heated by placing the microfluidic chip on a hot plate to maintain the internal temperature of the device  
225 at 30°C and confirmed by using a thermocouple in a similar arrangement. The product was then  
226 collected at the outlet of the device and either saved for analysis or recirculated through the device  
227 again to measure the effect of increasing residence times.

## 228 **2.8 On-chip purification**

229 The microfluidic device used for protein purification was designed with a series of posts at the  
230 end of the channel to entrap chromatography resin in the channel. For each device, we manually  
231 introduced Ni-charged profinity resin (Bio-Rad) into the channels before use. CFPS reactions  
232 expressing sfGFP<sup>DQ<sub>N</sub>A<sub>T</sub>-6xHis</sup> were then introduced into the inlet of the device with a total residence time  
233 of 30 min per chip and the outlet was collected and analyzed as the flowthrough fraction. The device  
234 was rinsed with PBS containing 10 mM imidazole at a flowrate of 2  $\mu\text{L}/\text{min}$  and any unbound protein  
235 was collected and analyzed as the wash fraction. Finally, the target protein was eluted from the resin  
236 with PBS containing 300 mM imidazole at a flow rate of 2  $\mu\text{L}/\text{min}$ . The fluorescence of each fraction  
237 was analyzed using a microplate reader to determine the GFP concentration and assayed for purity  
238 using standard SDS-PAGE with Coomassie blue staining.

## 239 **2.9 Immunoblot analysis**

240 For immunoblot analysis of IVG products and CjPglB-biotin, samples were diluted 3:1 in 4 $\times$   
241 NuPAGE LDS sample buffer (Invitrogen) supplemented with 10% beta-mercaptoethanol (v/v). IVG  
242 products were boiled at 100°C for 10 min while CjPglB-biotin samples were held at 65°C for 5 min.  
243 The treated samples were subjected to SDS-polyacrylamide gel electrophoresis on Bolt™ 12% Bis-  
244 Tris Plus Protein Gels (Invitrogen). The separated protein samples were then transferred to  
245 polyvinylidene difluoride (PVDF) membranes. Following transfer, the membranes containing IVG  
246 samples were blocked with 5% milk (w/v) in TBST (TBS, 0.1% Tween 20) and then probed with  
247 horseradish peroxidase (HRP) conjugated anti-His antibody (1: 5,000) (Abcam, catalog # ab1187) or  
248 rabbit polyclonal serum, hR6, that is specific for the *C. jejuni* heptasaccharide glycan (1:10,000)  
249 (kindly provided by Markus Aebi) for 1 h. To detect hR6 serum antibodies, goat anti-rabbit IgG  
250 conjugated to HRP (1:5,000) (Abcam, catalog # ab205718) was used as the secondary antibody. The  
251 membranes containing CjPglB-biotin samples were blocked with 5% bovine serum albumin (BSA)  
252 (w/v) in TBST and then probed with ExtrAvidin-Peroxidase (1:10,000) (MilliporeSigma, catalog #  
253 E2886) for 1 h. After washing five times with TBST for 5 min, the membranes were visualized with  
254 Clarity ECL substrate (Bio-Rad) using a ChemiDoc™ MP Imaging System (Bio-Rad).

## 255 **3 Results**

### 256 **3.1 Design of a modular microfluidic platform for continuous glycoprotein production**

257 The design of our microfluidic-based glycoprotein biosynthesis platform integrated three key  
258 processes: protein expression, protein glycosylation, and protein purification (**Fig. 1**). In the first

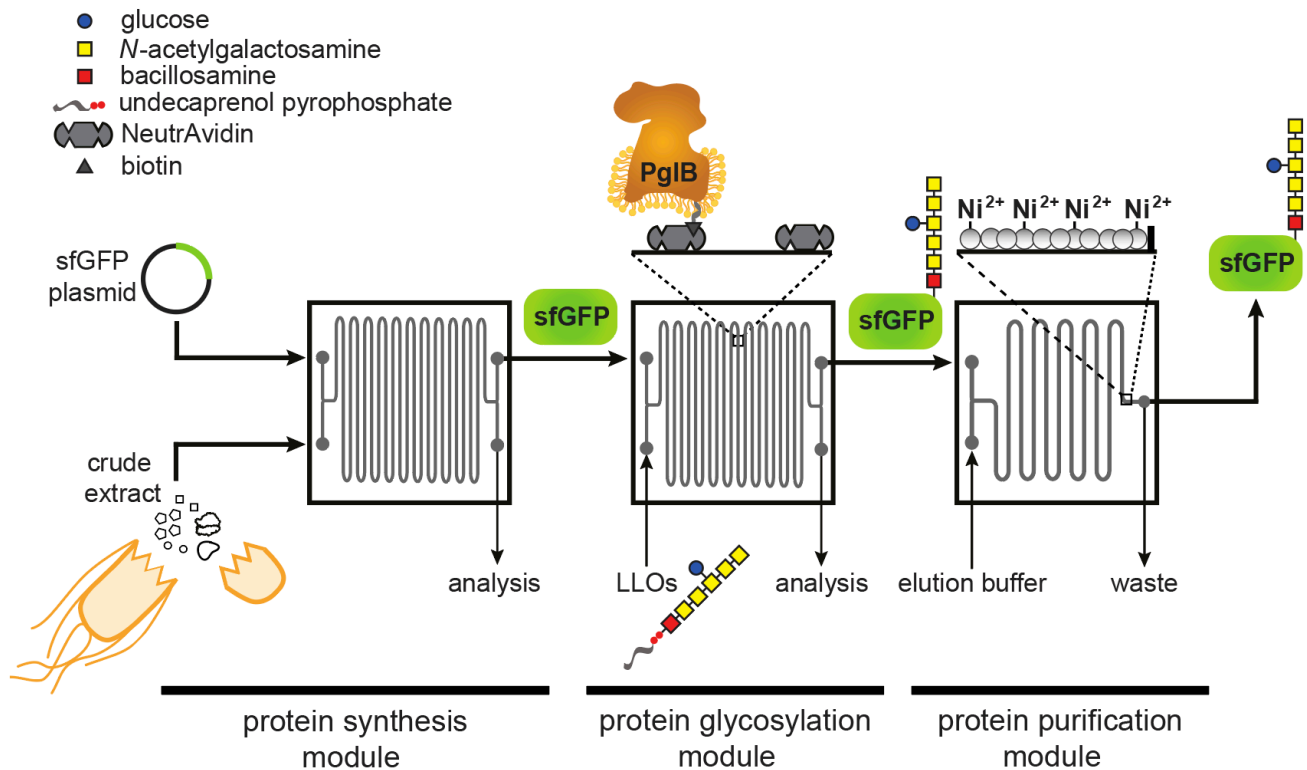

259

260 **Figure 1. Schematic of glycosylation-on-a-chip system.** The microfluidic platform integrates cell-free protein synthesis,  
261 glycosylation, and purification. In the first module of the device, one stream containing *E. coli* cell-free extract and a second  
262 stream containing plasmid DNA encoding the acceptor protein are combined at the inlet and mixed by diffusion as they  
263 travel through the channels. The product of the first chip is then delivered to a second module where it is subjected to an  
264 environment enriched with glycosylation machinery. In this case, glycosylation machinery is derived from *C. jejuni*  
265 and includes: (i) the OST enzyme, *CjPglB*, that is tethered to the surface of the device and serves as the conjugating enzyme;  
266 and (ii) *CjLLOs* comprised of undecaprenol-pyrophosphate-linked heptasaccharide from *C. jejuni* as the glycan donor. In  
267 the third module, protein product is isolated using immobilized metal affinity capture (IMAC). Depicted is the *C. jejuni*  
268 GalNAc<sub>5</sub>(Glc)Bac heptasaccharide with reducing end bacillosamine (Bac; red square) followed by five *N*-  
269 acetylgalactosamine residues (GalNAc; yellow squares) and a branching glucose (Glc; blue circle). Structure drawn  
270 according to symbol nomenclature for glycans (SNFG; <https://www.ncbi.nlm.nih.gov/glycans/snfg.html>).  
271

272

273 module of the device, sfGFP bearing a C-terminal DQNAT glycosylation motif<sup>34</sup> that is optimally  
274 recognized by *CjPglB*<sup>37,42</sup> and a hexahistidine tag was expressed using crude S30 extract derived from  
275 *E. coli*, which enabled transcription and translation of the target protein on chip. We chose sfGFP as  
276 the acceptor protein so that the protein production and purification processes could be visualized and  
277 easily quantified during optimization of the microfluidic system. Next, in the second module, site-  
278 specific glycosylation was achieved by subjecting the newly expressed sfGFP<sup>DQNAT-6xHis</sup> to components  
279 derived from a well-characterized bacterial *N*-linked glycosylation pathway, which occurs natively in  
280 the bacterium *C. jejuni* and has been functionally transferred to *E. coli*<sup>36</sup>. These components included  
281 *CjPglB* as the glycan conjugating enzyme and *CjLLOs* comprised of the *C. jejuni* GalNAc<sub>5</sub>(Glc)Bac  
282 heptasaccharide linked to undecaprenol-pyrophosphate as the glycan donor. *CjPglB* and its cognate *N*-  
283 glycan structure were chosen here for proof-of-concept experiments because of the high transfer  
284 efficiency that has been observed with these components both *in vivo*<sup>40,43</sup> and *in vitro*<sup>18,24</sup>. However, in  
285 a notable departure from previous works, we sought to site-specifically biotinylate *CjPglB* and  
286 subsequently immobilize it in the device using biotin and streptavidin interactions, thereby enabling  
287 reuse of this important membrane protein biocatalyst<sup>44</sup>. Lastly, in the third module, the sfGFP<sup>DQNAT-</sup>  
288 <sup>6xHis</sup> product was selectively enriched using a microfluidic device loaded with affinity resin that  
facilitated reversible capture of the hexahistidine-tagged glycoprotein product. The modularity of the

289 device was designed to enable optimization of each unit operation and to allow flexible biosynthesis  
290 of different glycoproteins by simply interchanging acceptor protein target plasmids, glycosylation  
291 enzymes, LLO donors, affinity tags, and chromatography resins.

292 For the microfluidic device design, we aimed to create a system where protein synthesis,  
293 glycosylation, and protein purification could happen continuously in series at a fixed flow rate.  
294 Therefore, we fabricated individual chips to serve as building blocks that could be serially connected  
295 to increase the residence time of a particular process as needed. To test this design, we used an etched  
296 silicon wafer as a mold to fabricate channels in polydimethylsiloxane (PDMS) that was subsequently  
297 attached to glass slides. We chose PDMS because it enabled low-cost microfluidic fabrication that was  
298 sufficiently robust for device prototyping. Each microfluidic chip involved a serpentine channel design  
299 (width = 200  $\mu\text{m}$ , depth = 120  $\mu\text{m}$ , volume = 11  $\mu\text{L}$ ) that was inspired by previous work in which a  
300 similarly designed microfluidic bioreactor resulted in enhanced CFPS productivity<sup>28</sup>. Additionally, we  
301 hypothesized that long serpentine channels with a high surface area-to-volume ratio would promote  
302 efficient glycosylation by allowing sufficiently high levels of *CjPglB* enzyme to be tethered to the  
303 device, thereby increasing the probability of contact with substrates. For the purification module, an  
304 immobilized metal affinity chromatography (IMAC) strategy was implemented whereby 25- $\mu\text{m}$  posts  
305 were spaced apart from one another at the outlet of the device and the resulting channels were filled  
306 with  $\text{Ni}^{2+}$ -charged beads for efficient hexahistidine-tagged protein capture.

### 307 **3.2 Continuous-flow CFPS module improves protein production**

308 As a first test of our design, we measured the on-chip protein titers obtained from the protein  
309 synthesis module following two modes of operation—batch and continuous flow—and compared these  
310 to the titers produced from one-pot reactions performed in standard microcentrifuge tubes. For these  
311 experiments, we generated crude S30 extract from *E. coli* strain BL21 Star<sup>TM</sup> (DE3) using a low-cost,  
312 sonication-based method<sup>41</sup> and the resulting extract was primed with plasmid pJL1-sfGFP<sup>DQNAT-6xHis</sup>  
313 to drive the expression of sfGFP<sup>DQNAT-6xHis</sup>. In a standard 15- $\mu\text{L}$ , one-pot CFPS reaction using a  
314 microcentrifuge tube, we produced 11.9  $\mu\text{g}/\text{mL}$  of sfGFP<sup>DQNAT-6xHis</sup> in two hours (**Fig. 2a** and  
315 **Supplementary Fig. 1**). To determine how the microfluidic environment affected sfGFP expression,  
316 we next performed batch-mode CFPS reactions in the first module of the microfluidic device.  
317 Specifically, the device was quickly filled with the same CFPS reaction mixture and fluorescence  
318 evolution was monitored in 30-min increments. When all CFPS components were present, fluorescence  
319 emission in the microfluidic channels gradually increased over time (**Fig. 2b**), corresponding to  
320 production of 9.4  $\mu\text{g}/\text{mL}$  of sfGFP<sup>DQNAT-6xHis</sup> in two hours (**Fig. 2a**). This result confirmed that the  
321 microfluidic environment itself had little-to-no effect on batch-mode CFPS productivity. It is also  
322 worth noting that surface blocking within the device was sufficient to allow sfGFP<sup>DQNAT-6xHis</sup> clearance  
323 from the channels by simple rinsing.

324 We next investigated the effect of continuous flow on CFPS-based sfGFP expression. To  
325 generate a device that could accommodate a two-hour residence time (and thus be directly comparable  
326 to the batch-mode experiments above), we created a multi-chip system by linking individual devices  
327 with short pieces of tubing. Two input streams, one containing plasmid, energy, salts, and metabolites  
328 and the other containing S30 extract and T7 polymerase, met at the inlet and were mixed via diffusion  
329 between the two parallel streams as they moved through the channels (**Fig. 2c**). In a four-chip system,  
330 corresponding to a two-hour residence time, we observed increasing fluorescence along the length of  
331 the channels from the inlet to the outlet corresponding to production of 38.3  $\mu\text{g}/\text{mL}$  of sfGFP<sup>DQNAT-6xHis</sup>  
332 (**Fig. 2a** and **d**). Fluorescence across the width of the channels was uniform, indicating that the  
333 solution was well-mixed. Additionally, when comparing the fluorescence generation in two-, three-,  
334 and four-chip systems, corresponding to one, one and a half-, and two-hour residence times,  
335 respectively, we observed non-linear protein production with the maximum production rate occurring



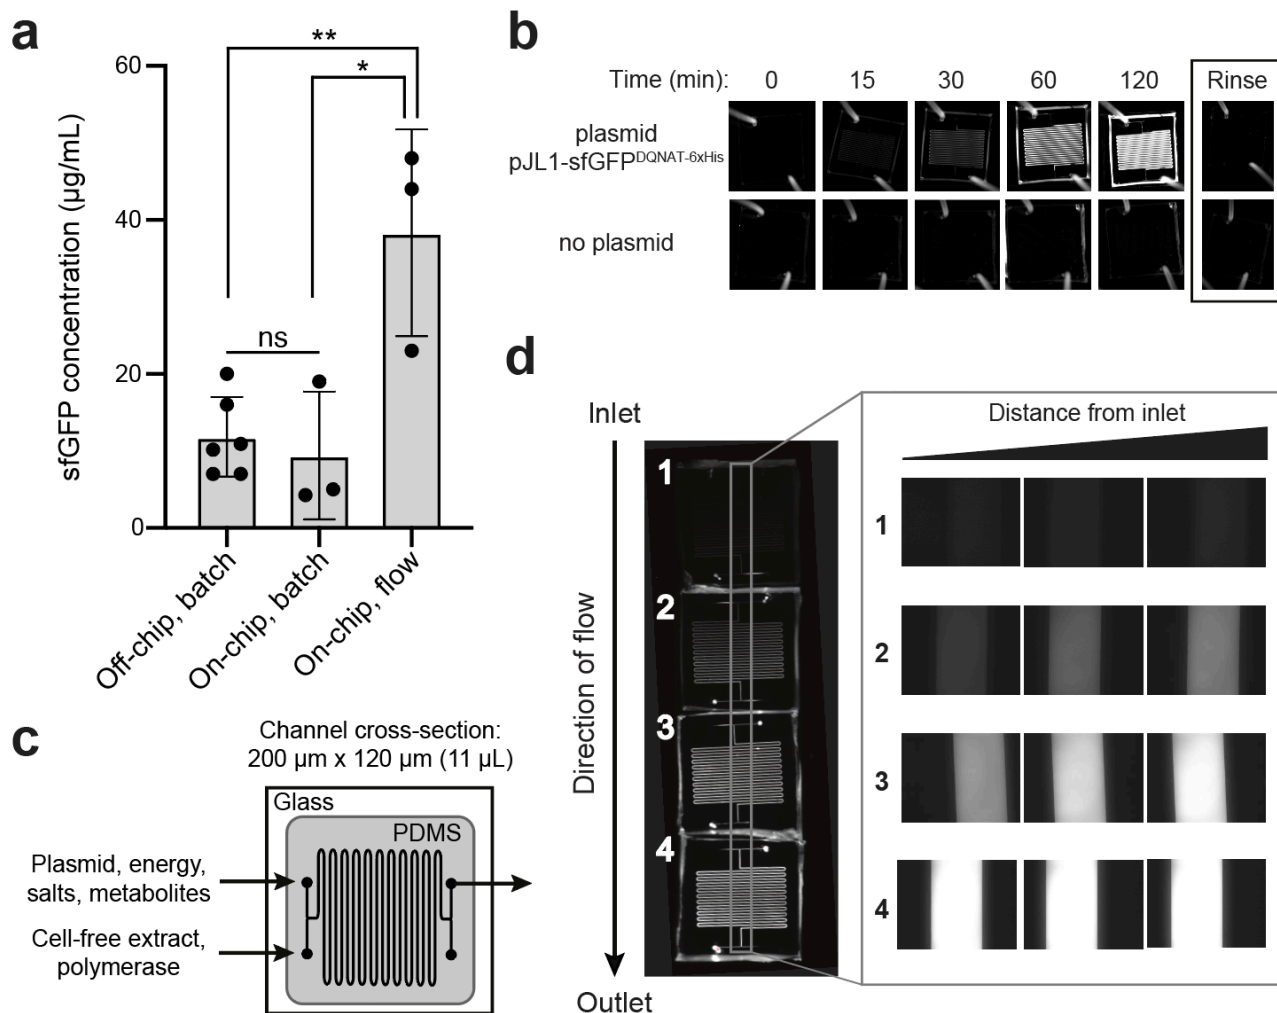

336

337 **Figure 2. On-chip cell-free protein synthesis.** (a) Fluorescence imaging of batch-mode operation in which all CFPS  
 338 components were mixed, flow into the microfluidic chip, and allowed to react over a two-hour period. Representative  
 339 images showing sfGFP<sup>DQNAT-6xHis</sup> synthesis within the chip (top row) and a control experiment where plasmid was omitted  
 340 from the CFPS reaction mixture (bottom row). (b) Mean sfGFP<sup>DQNAT-6xHis</sup> concentration produced from the following  
 341 reactions: off-chip, batch mode in a microcentrifuge tube; on-chip, batch mode in the microfluidic device; and on-chip,  
 342 continuous-flow mode in the microfluidic device. For the on-chip systems, measurements were made on samples collected  
 343 at the outlet of the chips. Data are the average of biological replicates ( $n = 3$ ), error bars represent standard deviation, and  
 344  $p$  values were determined by paired sample  $t$ -test (\*,  $p < 0.1$ ; \*\*,  $p < 0.01$ ; and ns, not significant). (c) Serpentine channel  
 345 microfluidic design for flow-based CFPS. The flow rate was set so that the reaction residence within each chip was 30 min.  
 346 Cell-free extract and plasmid DNA were added at separate inlets so that protein synthesis was initiated inside the device.  
 347 (d) Representative fluorescence images of continuous-flow mode in which four chips were linked together for a two-hour  
 348 reaction residence time and reactants were flown into the two inlets. Inset shows expanded view of the regions within the  
 349 gray box in the image at left.

350

351 between one and one and a half hours (**Supplementary Fig. 2a and b**). Importantly, the production  
 352 rates in equivalent chips were similar, indicating that linking chips in series is a viable method for  
 353 varying the residence time. Lastly, when comparing the titers of the two modes of on-chip operation  
 354 relative to the microcentrifuge tube reaction for a two-hour residence time, we observed that  
 355 sfGFP<sup>DQNAT-6xHis</sup> produced on-chip in batch mode was statistically similar to off-chip production in a  
 356 microcentrifuge tube, whereas introducing flow to the system significantly improved production by  
 357 several-fold compared to both batch operations (**Fig. 2a**). This increase in production has also been  
 358 observed by others<sup>28</sup> and can be attributed to shorter diffusion lengths in the microfluidic channels.

### 359 3.3 Tethered OST enzyme enables a continuous-flow glycosylation module

360 In the protein glycosylation module, we sought to develop an OST tethering strategy that would  
361 allow for efficient protein glycosylation as the reaction substrates—the acceptor protein and LLOs—  
362 were continuously flown over the immobilized OST enzymes within the device. The advantage of OST  
363 tethering is that it enables creation of a local environment with a high concentration of OST enzyme  
364 that is reused in continuous operation. Such a reusable configuration is significant because OSTs are  
365 integral membrane proteins that are laborious and time consuming to produce in purified form<sup>45</sup>. For  
366 surface immobilization of *CjPglB*, we leveraged avidin-biotin technology because it afforded the  
367 opportunity to site-specifically modify the OST with biotin such that enzymatic activity was minimally  
368 affected. To this end, an AviTag was genetically fused to the C-terminus of *CjPglB*, providing a unique  
369 site for covalent biotin conjugation by separately prepared BirA enzyme. Biotinylation of *CjPglB* was  
370 confirmed by immunoblot analysis using commercial ExtrAvidin-Peroxidase that specifically detects  
371 biotin (**Fig. 3a**). To verify that enzymatic activity of *CjPglB*-biotin was not diminished by this  
372 modification or subsequent tethering onto a solid support, we performed off-chip *in vitro* glycosylation  
373 (IVG) reactions in a microcentrifuge tube using purified sfGFP<sup>DQNAT-6xHis</sup> as acceptor protein, *CjLLOs*  
374 as glycan donor, and either untethered *CjPglB*-biotin or *CjPglB*-biotin that was tethered to commercial  
375 streptavidin beads. Immunoblot analysis of the sfGFP<sup>DQNAT-6xHis</sup> produced in these reactions was  
376 performed using an anti-His antibody to detect the protein/glycoprotein and hR6 serum that specifically  
377 recognizes the *C. jejuni* heptasaccharide. These blots revealed 100% conversion of sfGFP<sup>DQNAT</sup> to the  
378 glycosylated form (g1) in reactions with both untethered and tethered *CjPglB*-biotin, but only when  
379 the microcentrifuge tube for the latter reactions was shaken to keep the beads well suspended in  
380 solution (**Fig. 3b**). In the absence of shaking, the beads were observed to sink to the bottom of the  
381 microcentrifuge tube so that *CjPglB*-biotin was not well dispersed within the reaction mixture, thereby  
382 reducing glycosylation efficiency as evidenced by the detection of sfGFP<sup>DQNAT</sup> in a predominantly  
383 aglycosylated form (g0). Importantly, these results confirmed that *CjPglB* tolerated both site-specific  
384 biotinylation and tethering to a solid surface without any measurable loss in enzyme activity.

385 Encouraged by these results, we went on to investigate a strategy for surface tethering of *CjPglB*-  
386 biotin within the channels of our microfluidic device. To provide an evenly distributed, functionalized  
387 surface having low non-specific adsorption of other biomolecules, we modified the surface of our  
388 device with a silane-PEG5000-biotin moiety. This molecular weight of PEG has been shown to  
389 effectively reduce non-specific binding<sup>46</sup> and to improve surface coverage compared to traditional  
390 coupling methods<sup>47</sup>. Here, silane-PEG5000-biotin provided a highly selective binding surface that was  
391 observed to promote higher loading capacity compared to non-specific adsorption to non-biotinylated  
392 silane-PEG5000 when visualized with fluorescently labeled streptavidin (**Supplementary Fig. 3a**).  
393 Comparing the surface coverage of the functionalized PEG brush to that of the non-covalent random  
394 adsorption also showed that we had a 30% increase in streptavidin coverage, allowing us to load more  
395 enzyme onto the surface of the device. Next, unlabeled NeutrAvidin was immobilized on the silane-  
396 PEG5000-biotin surface and was observed to bind fluorescently labeled, free biotin (**Supplementary**  
397 **Fig. 3b**), indicating that unliganded binding sites in surface-bound NeutrAvidin, which has four  
398 putative biotin-binding pockets, were available to capture additional biotin groups. Collectively, these  
399 experiments confirmed that silane-PEG5000-biotin provided a highly selective, passivating surface  
400 that increased binding capacity.

401 To evaluate this tethering strategy in the context of *CjPglB*, we coated the channels of our  
402 microfluidic device with silane-PEG5000-biotin, followed by the addition of streptavidin and then  
403 *CjPglB*-biotin (**Fig. 3a**). To determine whether immobilization of *CjPglB* in this manner resulted in a  
404 glycosylation-competent device, we first performed on-chip IVG reactions in batch mode without flow.  
405 This involved manually pushing IVG reaction components—sfGFP<sup>DQNAT-6xHis</sup> and *CjLLOs*—over  
406 *CjPglB* that was tethered in the microfluidic device. The sfGFP<sup>DQNAT-6xHis</sup> product was collected from

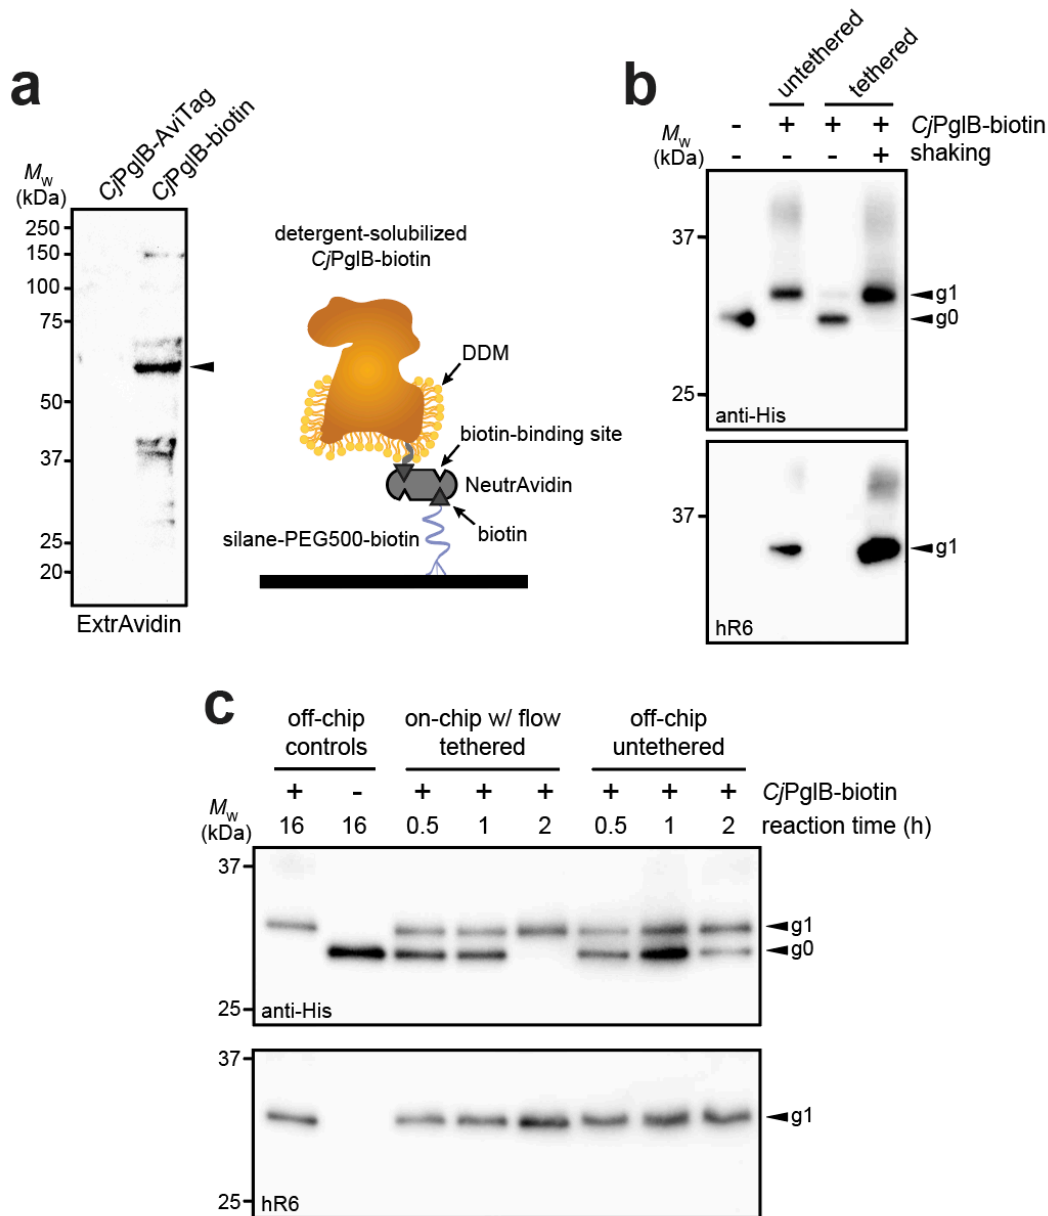

407  
408 **Figure 3. On-chip protein glycosylation.** (a) Immunoblot analysis of CjPglB bearing C-terminal AviTag that was  
409 subjected to biotinylation by treatment with BirA-containing lysate. Blot was probed with ExtrAvidin-Peroxidase that  
410 specifically detects biotin. Arrow denotes the expected molecular weight of CjPglB-biotin. Schematic at right illustrates  
411 the tethering strategy used to immobilize CjPglB-biotin generated in (a) within the channels of the microfluidic device.  
412 Schematic of CjPglB-biotin tethering system. Silane-PEG5000-biotin was used to modify the surface of hydroxylated glass.  
413 Neutravidin, which has four binding sites with high affinity for biotin, was used to link CjPglB-biotin to the surface of the  
414 device. (b) Immunoblot analysis of IVG reaction products generated in microcentrifuge tubes containing detergent-  
415 solubilized CjPglB-biotin (untethered) or detergent-solubilized CjPglB-biotin immobilized on streptavidin-coated beads  
416 (tethered). In the case of the latter, batch-mode reactions were performed with (+) or without (-) shaking as indicated. Blots  
417 were probed with an anti-polyhistidine (anti-His) antibody that recognized the C-terminal 6xHis tag on sfGFP<sup>DQNAT-6xHis</sup>  
418 and hR6 serum that specifically recognizes the *C. jejuni* heptasaccharide glycan. (c) Immunoblot analysis of IVG reaction  
419 products generated using the on-chip, continuous-flow system with detergent-solubilized CjPglB-biotin immobilized in the  
420 device channels (on-chip tethered) or the off-chip microcentrifuge system with detergent-solubilized CjPglB-biotin free in  
421 solution (off-chip untethered). For the on-chip system, IVG components were flown through the channels, and the product  
422 was collected from the device outlet. Products from overnight microcentrifuge reactions in the presence (+) or absence (-)  
423 of CjPglB-biotin were included as controls for glycosylation efficiency. Blots were probed identically as in (b). Arrows in  
424 (b) and (c) denote the monoglycosylated (g1) or aglycosylated (g0) sfGFP<sup>DQNAT-6xHis</sup> products in each blot. Molecular weight  
425 ( $M_w$ ) markers are indicated at left of all blots.

426 the chip and analyzed by immunoblotting, which revealed barely detectable glycosylation that was  
427 significantly less efficient than the glycosylation observed for an on-chip, batch-mode control reaction  
428 performed concurrently in a microcentrifuge tube (**Supplementary Fig. 4a**). To determine if  
429 continuous flow would remedy this issue, we next flowed the IVG reaction components over the  
430 device-tethered *CjPglB* across a series of chips, each with a reaction residence time of 30 min. In  
431 parallel, batch reactions in microcentrifuge tubes were conducted at the same time for comparison. For  
432 these off-chip reactions, we calculated the maximum amount of enzyme that could theoretically be  
433 bound to the microfluidic surface and used that amount in the microcentrifuge-based reactions. It  
434 should be noted that this amount is likely higher than what is tethered within the device. The  
435 sfGFP<sup>DQNAT-6xHis</sup> products from these reactions were analyzed by immunoblotting as above, with  
436 readily detectable glycosylation occurring in the on-chip, continuous-flow system that was on par in  
437 terms of efficiency with the off-chip microcentrifuge reactions (**Fig. 3b** and **Supplementary Fig. 4b**).  
438 Interestingly, the addition of flow even appeared to enhance the reaction kinetics, akin to what was  
439 observed in the CFPS module.

### 440 3.4 IMAC module enables continuous enrichment of product proteins

441 In the third module of our device, we sought to capture polyhistidine-tagged sfGFP<sup>DQNAT-6xHis</sup>  
442 using an affinity capture strategy. By selectively binding our target protein, unwanted cellular debris,  
443 cofactors, and other waste products generated from the upstream reactions can be easily removed by  
444 flow-based rinsing. The glycoprotein product can then be recovered by elution with buffer containing  
445 a high concentration of imidazole. Using a design based on earlier works<sup>31,48</sup>, we prepared a PDMS  
446 microfluidic device with posts at the outlet that could be packed with commercial Ni<sup>2+</sup>-charged beads,  
447 thereby enabling on-chip IMAC (**Fig. 4a**). To test this strategy, we attempted to purify sfGFP<sup>DQNAT-</sup>  
448 <sup>6xHis</sup> in CFPS reaction mixtures that were flowed through the device with the initial exit stream collected  
449 as the flowthrough. Next, we switched the inlet stream to buffer for washing the IMAC resin and  
450 removing any non-specifically bound proteins. Finally, we eluted the hexahistidine-tagged protein  
451 product using imidazole. The loading and elution steps were monitored by fluorescence imaging of the  
452 device (**Supplementary Fig. 5a**) while the composition of each purification fraction was analyzed by  
453 SDS-PAGE analysis (**Fig. 4b** and **Supplementary Fig. 5b**). Based on multiple trials, we achieved 78  
454 ± 10% purity in the final product (**Fig. 4b**). To determine the efficiency of product capture, we  
455 measured the fluorescence of each fraction and calculated the percent sfGFP<sup>DQNAT-6xHis</sup> that was  
456 present. While there was some variation in the capture efficiency, we reproducibly captured 45 ± 14%  
457 of total produced sfGFP<sup>DQNAT-6xHis</sup> (**Fig. 4c**). It should be noted that more complicated device  
458 configurations may improve the overall capture efficiency; nonetheless, our results are comparable to  
459 other microfluidic capture strategies<sup>32</sup>. This simple strategy for protein purification provides a  
460 convenient way to obtain a purified final protein product. Because of the modularity of our design,  
461 other types of resin (e.g., glycan-binding affinity reagents) could be used in place of, or in addition to  
462 the set-up shown here depending on the desired separation. Additionally, multiple devices could be  
463 connected for larger scale purifications.

## 464 4 Discussion

465 In this work, we designed and fabricated a microfluidic platform for flow-based, cell-free  
466 production of a model *N*-linked glycoprotein. This was accomplished in a modular system where  
467 protein synthesis, glycosylation, and purification were compartmentalized and individually optimized.  
468 In this approach, production rates were increased for continuous-flow processes compared to batch  
469 processes and protein production occurred at a faster rate than glycosylation. Importantly, the device  
470 was capable of glycosylating 100% of the added acceptor protein within two hours.



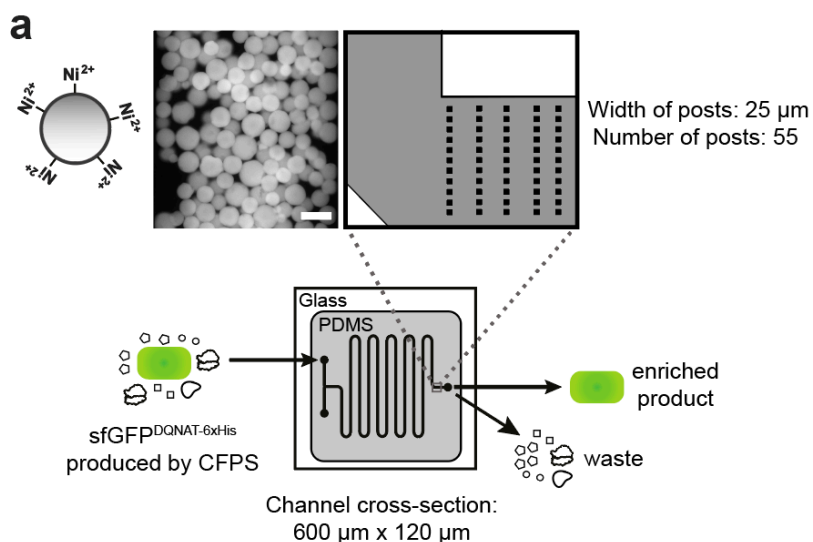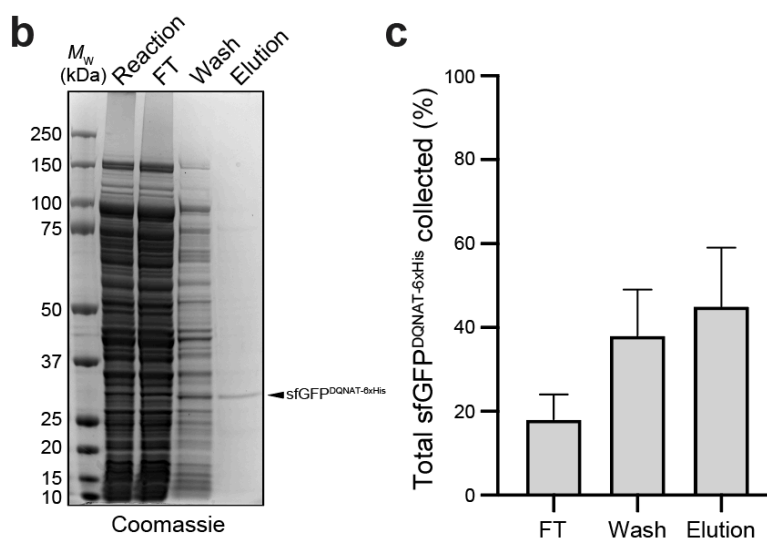

471  
472 **Figure 4. On-chip enrichment of CFPS product.** (a) Schematic of purification module. The channels were designed to  
473 be 600- $\mu\text{m}$  wide with fifty-five 25- $\mu\text{m}$  posts at the outlet to accommodate  $\text{Ni}^{2+}$ -functionalized beads. Shown at left is a  
474 representative fluorescence microscopy image of  $\text{Ni}^{2+}$ -charged beads bound to sfGFP<sup>DQNA T-6xHis</sup> within the device. After  
475 completion of CFPS reaction, product is pushed through the beads to allow for hexahistidine-tagged protein to bind to  $\text{Ni}^{2+}$   
476 and flowthrough (FT) fraction is collected. Beads are then washed to remove any non-specifically bound proteins and wash  
477 fraction is collected. Finally, protein product is recovered through addition of buffer containing high concentration of  
478 imidazole and collected as elution fraction. (b) Representative Coomassie-stained SDS-PAGE gel comparing the protein  
479 composition of purification fractions as indicated. Arrow denotes the expected molecular weight of sfGFP<sup>DQNA T-6xHis</sup>.  
480 Molecular weight ( $M_w$ ) ladder is indicated at left. (c) Comparison of the amount of sfGFP<sup>DQNA T-6xHis</sup> in each purification  
481 fraction represented as percentage of the total amount of sfGFP<sup>DQNA T-6xHis</sup> collected. Data are the mean of biological  
482 replicates ( $n = 4$ ) and error bars represent standard error of the mean.

484 One of the most significant developments in this work was the demonstration that the pivotal  
485 glycosylation catalyst, *CjPglB*, could be successfully immobilized within the device while maintaining  
486 high glycosylation efficiency. As a multi-pass transmembrane protein with regions in the membrane  
487 portion that are required for activity<sup>49</sup>, *CjPglB* is challenging to express and purify; hence, the  
488 opportunity to reuse this enzyme in a continuous fashion should help to relieve a major bottleneck  
489 related to mechanistic studies of this enzyme and its biotechnological exploitation. Furthermore, the  
490 ability to achieve 100% glycosylation efficiency within the device allowed the glycoprotein product to  
491 be purified in a single step using IMAC. We anticipate that for less efficiently glycosylated proteins,

492 an additional purification step using immobilized lectins or antibodies that specifically bind to the  
493 glycan could be implemented for glycoprotein enrichment.

494 For the proof-of-concept studies performed herein, we selected the *C. jejuni* *N*-linked  
495 glycosylation system as a model because of the flexibility of *CjPglB* as a stand-alone, single-subunit  
496 OST<sup>44</sup> that has proven to be compatible with a diverse array of glycan donors and acceptor protein  
497 substrates including some with therapeutic potential. To date, *CjPglB* has been used to generate  
498 glycoproteins bearing bacterial<sup>24,35,50</sup> and smaller human-type glycans<sup>24,51–54</sup>, and has enabled cell-free,  
499 one-pot systems for making *N*- and *O*-linked glycoproteins<sup>24,55</sup> as well as antibacterial conjugate  
500 vaccines<sup>56</sup>. While not directly demonstrated in this work, cell-free strategies such as the glycosylation-  
501 on-a-chip platform described here could eventually provide access to glycoproteins that are modified  
502 with larger, complex-type *N*-glycans that mimic the structures commonly found on many human  
503 glycoprotein drugs such as monoclonal antibodies. This could be achieved by one-step *en bloc* transfer  
504 of fully assembled complex-type *N*-glycans or could instead be subdivided into discrete,  
505 compartmentalized modules. For example, we previously developed methods for *CjPglB*-mediated  
506 transfer of the eukaryotic trimannosyl core *N*-glycan, mannose<sub>3</sub>-*N*-  
507 acetylglucosamine<sub>2</sub> (Man<sub>3</sub>GlcNAc<sub>2</sub>), onto acceptor proteins both *in vivo* and *in vitro*<sup>24,53</sup>. The on-chip  
508 transfer of preassembled Man<sub>3</sub>GlcNAc<sub>2</sub> glycans onto acceptor protein targets could serve as a first  
509 modular step that could be followed in subsequent modules by a series of immobilized GTs for  
510 elaborating the protein-linked Man<sub>3</sub>GlcNAc<sub>2</sub> to discrete human-like *N*-glycan structures<sup>57</sup>.  
511 Alternatively, the ability of *CjPglB* to transfer a single *N*-acetylglucosamine (GlcNAc) or diGlcNAc  
512 structure onto a target peptide<sup>58</sup> provides a minimal glycan primer that could serve as an earlier starting  
513 point for single-enzyme transglycosylation using synthetic oligosaccharide oxazolines as donor  
514 substrates<sup>59</sup> or multi-enzyme, cell-free glycan construction<sup>23</sup>. Importantly, our demonstration that  
515 *CjPglB* can be immobilized in a microfluidic architecture without loss of catalytic activity is a critical  
516 first step to enabling any of these advanced strategies and paves the way for continuous production of  
517 a variety of therapeutically relevant glycoprotein products.

518 There has been increasing interest in the pharmaceutical industry to implement continuous  
519 manufacturing technologies that afford greater control over reaction variables, are amenable to  
520 automation, and are more flexible to changes in market demand compared to batch reactors<sup>60–62</sup>.  
521 Therefore, as a scaled-down model of flow-based systems, many researchers have investigated the use  
522 of microfluidic devices as microreactors for organic synthesis of pharmaceuticals<sup>63,64</sup>. Although  
523 biopharmaceuticals represent almost half of newly FDA approved therapeutics<sup>65</sup>, production of these  
524 more complex molecules by chemical means for incorporation into flow systems has been limited.  
525 Hence, our work expands the capability of microfluidic systems to now include production of *N*-linked  
526 glycoproteins by leveraging the open-box format of cell-free systems in a manner that provides  
527 spatiotemporal control over reactions, residence times, and concentrations. Looking forward, we  
528 anticipate that the flow-based glycoprotein production platform established here will inspire deeper  
529 exploration of cell-free technologies for continuous biomanufacturing of biologics.

## 530 **5 Data Availability Statement**

531 All data generated in this study are included in this article and its supplementary materials. Additional  
532 information is available from the authors upon reasonable request.

## 533 **6 Author Contributions**

534 A.K.A and Z.A.M are co-first authors of the manuscript and contributed equally to the experimental  
535 design, generation of data, and data analysis. Both have the right to list their name first in their CV,  
536 presentations, grants, etc. All authors contributed to project conceptualization, writing, and editing and  
537 have read and approved the final manuscript.

## 538 **7 Funding**

539 This work was supported by the Defense Threat Reduction Agency (HDTRA1-15-10052 and  
540 HDTRA1-20-10004 to M.P.D.), National Science Foundation (CBET-1159581, CBET-1264701,  
541 CBET-1936823, and MCB 1413563 to M.P.D.; CMMI 1728049 to SD and MD), and National  
542 Institutes of Health (1R01GM127578 to M.P.D.). A.K.A. was supported by the National Science  
543 Foundation Graduate Research Fellowship (Grant No. DGE-1650441). A.K.A and Z.A.M were  
544 supported by a Chemical-Biology Interface (CBI) training grant from the National Institute of General  
545 Medical Sciences of the National Institutes of Health (T32GM008500). The content is solely the  
546 responsibility of the authors and does not necessarily represent the official views of the National  
547 Institute of General Medical Sciences or the National Institutes of Health.

## 548 **8 Acknowledgements**

549 We thank Markus Aebi for providing strains CLM24 and SCM6 as well as hR6 serum used in this  
550 work. The authors also thank the Genomics Facility of the Biotechnology Resource Center at the  
551 Cornell Institute of Biotechnology for help with sequencing experiments and Thapakorn  
552 Jaroentomeechai, Han-Yuan Liu, Weston Kightlinger, and Mike Jewett for helpful discussions related  
553 to the manuscript.

## 554 **9 Conflict of Interest**

555 M.P.D. has a financial interest in Glycobia, Inc., Versatope Therapeutics, Inc., Swiftscale Biologics,  
556 Inc., and UbiquiTx, Inc. M.P.D.'s interests are reviewed and managed by Cornell University in  
557 accordance with their conflict of interest policies. All other authors declare no other competing  
558 interests.

## 559 **10 References**

- 560 1. Pinho, S. S. & Reis, C. A. Glycosylation in cancer: mechanisms and clinical implications. *Nat.*  
561 *Rev. Cancer* **15**, 540–555 (2015).
- 562 2. Dube, D. H. & Bertozzi, C. R. Glycans in cancer and inflammation - Potential for therapeutics  
563 and diagnostics. *Nat. Rev. Drug Discov.* **4**, 477–488 (2005).
- 564 3. Abu-Qarn, M., Eichler, J. & Sharon, N. Not just for Eukarya anymore: protein glycosylation in  
565 Bacteria and Archaea. *Curr. Opin. Struct. Biol.* **18**, 544–550 (2008).
- 566 4. Lin, C. W. *et al.* A common glycan structure on immunoglobulin G for enhancement of  
567 effector functions. *Proc. Natl. Acad. Sci. U. S. A.* (2015) doi:10.1073/pnas.1513456112.
- 568 5. Imperiali, B. & O'Connor, S. E. Effect of N-linked glycosylation on glycopeptide and  
569 glycoprotein structure. *Current Opinion in Chemical Biology* (1999) doi:10.1016/S1367-  
570 5931(99)00021-6.
- 571 6. Wolfert, M. A. & Boons, G. J. Adaptive immune activation: Glycosylation does matter.  
572 *Nature Chemical Biology* (2013) doi:10.1038/nchembio.1403.
- 573 7. Hebert, D. N., Lamriben, L., Powers, E. T. & Kelly, J. W. The intrinsic and extrinsic effects of  
574 N-linked glycans on glycoproteostasis. *Nature Chemical Biology* (2014)  
575 doi:10.1038/nchembio.1651.
- 576 8. Beckham, G. T. *et al.* Harnessing glycosylation to improve cellulase activity. *Curr. Opin.*  
577 *Biotechnol.* **23**, 338–345 (2012).
- 578 9. Wang, L. X., Tong, X., Li, C., Giddens, J. P. & Li, T. Glycoengineering of antibodies for  
579 modulating functions. *Annu. Rev. Biochem.* **88**, 433–459 (2019).
- 580 10. Berti, F. & Adamo, R. Antimicrobial glycoconjugate vaccines: An overview of classic and  
581 modern approaches for protein modification. *Chem. Soc. Rev.* **47**, 9015–9025 (2018).
- 582 11. Van Landuyt, L., Lonigro, C., Meuris, L. & Callewaert, N. Customized protein glycosylation  
583 to improve biopharmaceutical function and targeting. *Curr. Opin. Biotechnol.* **60**, 17–28

- 584 (2019).
- 585 12. Helenius, A. & Aebi, M. Intracellular functions of N-linked glycans. *Science* (2001)
- 586 doi:10.1126/science.291.5512.2364.
- 587 13. Nilsson, T., Au, C. E. & Bergeron, J. J. M. Sorting out glycosylation enzymes in the Golgi
- 588 apparatus. *FEBS Lett.* **583**, 3764–3769 (2009).
- 589 14. Lairson, L. L., Henrissat, B., Davies, G. J. & Withers, S. G. Glycosyl transferases: Structures,
- 590 functions, and mechanisms. *Annu. Rev. Biochem.* **77**, 521–555 (2008).
- 591 15. Hossler, P., Khattak, S. F. & Li, Z. J. Optimal and consistent protein glycosylation in
- 592 mammalian cell culture. *Glycobiology* **19**, 936–949 (2009).
- 593 16. Butler, M. & Spearman, M. The choice of mammalian cell host and possibilities for
- 594 glycosylation engineering. *Curr. Opin. Biotechnol.* **30**, 107–112 (2014).
- 595 17. Bosch, D. & Schots, A. Plant glycans: Friend or foe in vaccine development? *Expert Rev.*
- 596 *Vaccines* **9**, 835–842 (2010).
- 597 18. Guarino, C. & Delisa, M. P. A prokaryote-based cell-free translation system that efficiently
- 598 synthesizes glycoproteins. *Glycobiology* **22**, 596–601 (2012).
- 599 19. Chang, M. M. *et al.* Small-molecule control of antibody N-glycosylation in engineered
- 600 mammalian cells. *Nat. Chem. Biol.* **15**, 730–736 (2019).
- 601 20. Jaroentomeechai, T. *et al.* Cell-free synthetic glycobiology: designing and engineering
- 602 glycomolecules outside of living cells. *Front. Chem.*
- 603 21. Kightlinger, W., Warfel, K. F., Delisa, M. P. & Jewett, M. C. Synthetic Glycobiology: Parts,
- 604 Systems, and Applications. *ACS Synth. Biol.* **9**, 1534–1562 (2020).
- 605 22. Yu, H. & Chen, X. One-pot multienzyme (OPME) systems for chemoenzymatic synthesis of
- 606 carbohydrates. *Org. Biomol. Chem.* **14**, 2809–2818 (2016).
- 607 23. Kightlinger, W. *et al.* A cell-free biosynthesis platform for modular construction of protein
- 608 glycosylation pathways. *Nat. Commun.* (2019) doi:10.1038/s41467-019-12024-9.
- 609 24. Jaroentomeechai, T. *et al.* Single-pot glycoprotein biosynthesis using a cell-free transcription-
- 610 translation system enriched with glycosylation machinery. *Nat. Commun.* (2018)
- 611 doi:10.1038/s41467-018-05110-x.
- 612 25. Whitesides, G. M. The origins and the future of microfluidics. *Nature* **442**, 368–373 (2006).
- 613 26. Duncombe, T. A., Tentori, A. M. & Herr, A. E. Microfluidics: Reframing biological enquiry.
- 614 *Nature Reviews Molecular Cell Biology* (2015) doi:10.1038/nrm4041.
- 615 27. Georgi, V. *et al.* On-chip automation of cell-free protein synthesis: new opportunities due to a
- 616 novel reaction mode. *Lab Chip* **16**, 269–281 (2016).
- 617 28. Timm, A. C., Shankles, P. G., Foster, C. M., Doktycz, M. J. & Retterer, S. T. Characterization
- 618 of extended channel bioreactors for continuous-flow protein production. *J. Vac. Sci. Technol.*
- 619 *B, Nanotechnol. Microelectron. Mater. Process. Meas. Phenom.* (2015)
- 620 doi:10.1116/1.4932155.
- 621 29. Jackson, K., Kanamori, T., Ueda, T. & Hugh Fan, Z. Protein synthesis yield increased 72
- 622 times in the cell-free PURE system. *Integr. Biol.* **6**, 781 (2014).
- 623 30. Timm, A. C., Shankles, P. G., Foster, C. M., Doktycz, M. J. & Retterer, S. T. Toward
- 624 Microfluidic Reactors for Cell-Free Protein Synthesis at the Point-of-Care. *Small* **12**, 810–817
- 625 (2016).
- 626 31. Xiao, X. *et al.* Integration of cell-free protein synthesis and purification in one microfluidic
- 627 chip for on-demand production of recombinant protein. *Biomicrofluidics* **12**, (2018).
- 628 32. Murphy, T. W., Sheng, J., Naler, L. B., Feng, X. & Lu, C. On-chip manufacturing of synthetic
- 629 proteins for point-of-care therapeutics. *Microsystems Nanoeng.* **5**, 13 (2019).
- 630 33. Martin, J. G. *et al.* Toward an artificial Golgi: Redesigning the biological activities of heparan
- 631 sulfate on a digital microfluidic chip. *J. Am. Chem. Soc.* **131**, 11041–11048 (2009).
- 632 34. Fisher, A. C. *et al.* Production of secretory and extracellular N-linked glycoproteins in



- 633 Escherichia coli. *Appl. Environ. Microbiol.* (2011) doi:10.1128/AEM.01901-10.
- 634 35. Feldman, M. F. *et al.* Engineering N-linked protein glycosylation with diverse O antigen  
635 lipopolysaccharide structures in Escherichia coli. *Proc. Natl. Acad. Sci. U. S. A.* (2005)  
636 doi:10.1073/pnas.0500044102.
- 637 36. Wacker, M. *et al.* N-linked glycosylation in Campylobacter jejuni and its functional transfer  
638 into E. coli. *Science (80-. )*. (2002) doi:10.1126/science.298.5599.1790.
- 639 37. Kowarik, M. *et al.* Definition of the bacterial N-glycosylation site consensus sequence. *EMBO*  
640 *J.* (2006) doi:10.1038/sj.emboj.7601087.
- 641 38. Ikonomova, S. P., He, Z. & Karlsson, A. J. A simple and robust approach to immobilization of  
642 antibody fragments. *J. Immunol. Methods* (2016) doi:10.1016/j.jim.2016.04.012.
- 643 39. Kowarik, M. *et al.* N-linked glycosylation of folded proteins by the bacterial  
644 oligosaccharyltransferase. *Science (80-. )*. **314**, 1148–1150 (2006).
- 645 40. Ollis, A. A., Zhang, S., Fisher, A. C. & Delisa, M. P. Engineered oligosaccharyltransferases  
646 with greatly relaxed acceptor-site specificity. *Nat. Chem. Biol.* (2014)  
647 doi:10.1038/nchembio.1609.
- 648 41. Kwon, Y. C. & Jewett, M. C. High-throughput preparation methods of crude extract for robust  
649 cell-free protein synthesis. *Sci. Rep.* (2015) doi:10.1038/srep08663.
- 650 42. Gerber, S. *et al.* Mechanism of bacterial oligosaccharyltransferase: In vitro quantification of  
651 sequon binding and catalysis. *J. Biol. Chem.* **288**, 8849–8861 (2013).
- 652 43. Perregaux, E. *et al.* Substitute sweeteners: diverse bacterial oligosaccharyltransferases with  
653 unique N-glycosylation site preferences. *Sci. Rep.* **5**, 1–13 (2015).
- 654 44. Lizak, C., Gerber, S., Numao, S., Aebi, M. & Locher, K. P. X-ray structure of a bacterial  
655 oligosaccharyltransferase. *Nature* (2011) doi:10.1038/nature10151.
- 656 45. Schoborg, J. A. *et al.* A cell-free platform for rapid synthesis and testing of active  
657 oligosaccharyltransferases. *Biotechnol. Bioeng.* (2018) doi:10.1002/bit.26502.
- 658 46. Teramura, Y., Kuroyama, K. & Takai, M. Influence of molecular weight of PEG chain on  
659 interaction between streptavidin and biotin-PEG-conjugated phospholipids studied with QCM-  
660 D. *Acta Biomater.* **30**, 135–143 (2016).
- 661 47. Baranowska, M. *et al.* Protein attachment to silane-functionalized porous silicon: A  
662 comparison of electrostatic and covalent attachment. *J. Colloid Interface Sci.* **452**, 180–189  
663 (2015).
- 664 48. Zilberzwige-Tal, S. *et al.* Programmable On-Chip Artificial Cell Producing Post-  
665 Translationally Modified Ubiquitinated Protein. *Small* **1901780**, 1901780 (2019).
- 666 49. Napiórkowska, M. *et al.* Molecular basis of lipid-linked oligosaccharide recognition and  
667 processing by bacterial oligosaccharyltransferase. *Nat. Struct. Mol. Biol.* (2017)  
668 doi:10.1038/nsmb.3491.
- 669 50. Ihssen, J. *et al.* Production of glycoprotein vaccines in Escherichia coli. *Microb. Cell Fact.*  
670 (2010) doi:10.1186/1475-2859-9-61.
- 671 51. Hug, I. *et al.* Exploiting bacterial glycosylation machineries for the synthesis of a Lewis  
672 antigen-containing glycoprotein. *J. Biol. Chem.* (2011) doi:10.1074/jbc.M111.287755.
- 673 52. Shang, W. *et al.* Production of human blood group B antigen epitope conjugated protein in  
674 Escherichia coli and utilization of the adsorption blood group B antibody. *Microb. Cell Fact.*  
675 (2016) doi:10.1186/s12934-016-0538-z.
- 676 53. Valderrama-Rincon, J. D. *et al.* An engineered eukaryotic protein glycosylation pathway in  
677 Escherichia coli. *Nat. Chem. Biol.* **8**, 434–436 (2012).
- 678 54. Zhu, J. *et al.* An Engineered Pathway for Production of Terminally Sialylated N-glycoproteins  
679 in the Periplasm of Escherichia coli. *Front. Bioeng. Biotechnol.* **8**, 1–9 (2020).
- 680 55. Natarajan, A. *et al.* Engineering orthogonal human O-linked glycoprotein biosynthesis in  
681 bacteria. *Nat. Chem. Biol.* **16**, 1062–1070 (2020).

- 682 56. Stark, J. C. *et al.* On-demand biomanufacturing of protective conjugate vaccines. *Sci. Adv.* **7**,  
683 (2021).
- 684 57. Hamilton, B. S. *et al.* A library of chemically defined human N-glycans synthesized from  
685 microbial oligosaccharide precursors. *Sci. Rep.* (2017) doi:10.1038/s41598-017-15891-8.
- 686 58. Liu, F. *et al.* Rationally designed short polyisoprenol-linked PglB substrates for engineered  
687 polypeptide and protein N-glycosylation. *J. Am. Chem. Soc.* (2014) doi:10.1021/ja409409h.
- 688 59. Schwarz, F. *et al.* A combined method for producing homogeneous glycoproteins with  
689 eukaryotic N-glycosylation. *Nat. Chem. Biol.* **6**, 264–266 (2010).
- 690 60. Malet-Sanz, L. & Susanne, F. Continuous flow synthesis. a pharma perspective. *Journal of*  
691 *Medicinal Chemistry* (2012) doi:10.1021/jm2006029.
- 692 61. Poehlauer, P. *et al.* Pharmaceutical Roundtable Study Demonstrates the Value of Continuous  
693 Manufacturing in the Design of Greener Processes. *Org. Process Res. Dev.* (2013)  
694 doi:10.1021/op400245s.
- 695 62. Fisher, A. C. *et al.* The Current Scientific and Regulatory Landscape in Advancing Integrated  
696 Continuous Biopharmaceutical Manufacturing. *Trends in Biotechnology* (2019)  
697 doi:10.1016/j.tibtech.2018.08.008.
- 698 63. Porta, R., Benaglia, M. & Puglisi, A. Flow Chemistry: Recent Developments in the Synthesis  
699 of Pharmaceutical Products. *Organic Process Research and Development* (2016)  
700 doi:10.1021/acs.oprd.5b00325.
- 701 64. Wohlgemuth, R., Plazl, I., Žnidaršič-Plazl, P., Gernaey, K. V. & Woodley, J. M. Microscale  
702 technology and biocatalytic processes: Opportunities and challenges for synthesis. *Trends in*  
703 *Biotechnology* (2015) doi:10.1016/j.tibtech.2015.02.010.
- 704 65. Walsh, G. Biopharmaceutical benchmarks 2018. *Nat. Biotechnol.* (2018)  
705 doi:10.1038/nbt.4305.  
706
